# Supplementary material
Source: PubMed Central journal article supplement (PMC1924489)
Supplement: blood_blood-2006-11-058446_1.pdf [file blood_blood-2006-11-058446_1.pdf]

| Founders  | Lifespan (weeks) | Lymphoid organs involved    | Other organs involved |
|-----------|------------------|-----------------------------|-----------------------|
| p80HT     |                  |                             |                       |
| 808       | 41               | Lymph nodes, spleen         | Lung, liver           |
| 899       | 57               | Lymph nodes, spleen         | Lung, liver, kidney   |
| 817       | 63               | Lymph nodes, spleen, thymus | Lung, liver, kidney   |
| 826       | 87               | Lymph nodes, spleen         | Kidney                |
| 924       | 88               | Lymph nodes, spleen         | Lung, liver           |
| 809       | 89               | Lymph nodes, spleen, thymus | Lung, kidney          |
| 807       | 96 (killed)      | Lymph nodes, spleen         | Liver, kidney         |
| 815       | 96 (killed)      | Spleen                      | Lung                  |
| 857       | 96 (killed)      | Spleen                      | Liver                 |
| 876       | 96 (killed)      | No                          | No                    |
| 910       | 96 (killed)      | Lymph nodes                 | Lung                  |
| 915       | 96 (killed)      | Spleen                      | Liver                 |
| Wild type |                  |                             |                       |
| 834       | 87               | Lymph nodes, spleen         | No                    |
| 816       | 96 (killed)      | No                          | No                    |
| 828       | 96 (killed)      | Lymph nodes                 | No                    |
| 829       | 96 (killed)      | No                          | No                    |
| 830       | 96 (killed)      | No                          | No                    |
| 858       | 96 (killed)      | No                          | No                    |
